# Supplementary material
Source: PubMed Central journal article supplement (PMC5685260)
Supplement: Supplementary_Material.pdf [file Supplementary_Material.pdf]

| Row.names          | pvalue.HFTreat_vs_HFVeh | padj.HFTreat_vs_HFVeh | external_gene_name |
|--------------------|-------------------------|-----------------------|--------------------|
| ENSMUSG00000031485 | 0.004527948             | 0.049953192           | Prosc              |
| ENSMUSG00000029616 | 0.004527348             | 0.049953192           | Erp29              |
| ENSMUSG00000039062 | 0.004516826             | 0.049930963           | Anep               |
| ENSMUSG00000053801 | 0.004512141             | 0.049929502           | Grwd1              |
| ENSMUSG00000068240 | 0.00447785              | 0.049600105           | Gm11808            |
| ENSMUSG00000016534 | 0.004458092             | 0.049431175           | Lamp2              |
| ENSMUSG00000030447 | 0.004449028             | 0.049380605           | Cyfp1              |
| ENSMUSG00000025511 | 0.004435715             | 0.049282724           | Tspan4             |
| ENSMUSG00000027951 | 0.004424429             | 0.049207192           | Adar               |
| ENSMUSG00000009079 | 0.004423786             | 0.049207192           | Ewsr1              |
| ENSMUSG00000068739 | 0.004422237             | 0.049207192           | Sars               |
| ENSMUSG00000020307 | 0.004388222             | 0.04895345            | Cdc34              |
| ENSMUSG00000005907 | 0.004375767             | 0.048864218           | Pex1               |
| ENSMUSG00000025981 | 0.004373217             | 0.048864218           | Coq10b             |
| ENSMUSG00000032264 | 0.004356505             | 0.048748401           | Zw10               |
| ENSMUSG00000058254 | 0.004344923             | 0.048668465           | Tspan7             |
| ENSMUSG00000031824 | 0.00430713              | 0.048294461           | 6430548M08Rik      |
| ENSMUSG00000032393 | 0.004281615             | 0.048057517           | Dpp8               |
| ENSMUSG00000062270 | 0.004279354             | 0.048057517           | Morf4l1            |
| ENSMUSG00000063439 | 0.004269368             | 0.048018349           | B9d2               |
| ENSMUSG00000041849 | 0.004268093             | 0.048018349           | Card6              |
| ENSMUSG00000030245 | 0.004259572             | 0.048006643           | Golt1b             |
| ENSMUSG00000026482 | 0.004241796             | 0.04785549            | Rgl1               |
| ENSMUSG00000006005 | 0.004241397             | 0.04785549            | Tpr                |
| ENSMUSG00000029466 | 0.004215671             | 0.047658808           | Anapc7             |
| ENSMUSG00000022617 | 0.004174971             | 0.0472474             | Chkb               |
| ENSMUSG00000026617 | 0.00415715              | 0.047094329           | Bpnt1              |
| ENSMUSG00000033793 | 0.004140464             | 0.046953804           | Atp6v1h            |
| ENSMUSG00000040661 | 0.004137632             | 0.046953804           | Rad54l2            |
| ENSMUSG00000042737 | 0.004136698             | 0.046953804           | Dpm3               |
| ENSMUSG00000031557 | 0.004126846             | 0.046945014           | Plekha2            |
| ENSMUSG00000019470 | 0.004123591             | 0.046945014           | Xab2               |
| ENSMUSG00000029729 | 0.004114471             | 0.046901548           | Zkscan1            |
| ENSMUSG00000036957 | 0.004106123             | 0.046855089           | Lrfn3              |
| ENSMUSG00000070427 | 0.004101047             | 0.046845917           | Il18bp             |
| ENSMUSG00000031010 | 0.00409339              | 0.04680721            | Usp9x              |
| ENSMUSG00000021290 | 0.004089386             | 0.04680721            | 2010107E04Rik      |
| ENSMUSG00000050621 | 0.004088414             | 0.04680721            | Rps27rt            |
| ENSMUSG00000036216 | 0.004066172             | 0.04664189            | Leap2              |
| ENSMUSG00000039633 | 0.004057202             | 0.046587725           | Lonrf1             |
| ENSMUSG00000026458 | 0.004049425             | 0.046547164           | Ppfia4             |
| ENSMUSG00000026014 | 0.004021399             | 0.046273519           | Raph1              |
| ENSMUSG00000029642 | 0.004007432             | 0.046161238           | Polr1d             |
| ENSMUSG00000019989 | 0.003998083             | 0.046101974           | Enpp3              |
| ENSMUSG00000029596 | 0.003980065             | 0.045942516           | Sdsl               |
| ENSMUSG00000024053 | 0.003974718             | 0.045929149           | Emilin2            |

|                    |             |                      |
|--------------------|-------------|----------------------|
| ENSMUSG00000007872 | 0.003963806 | 0.045851371 Id3      |
| ENSMUSG00000029392 | 0.003959414 | 0.045848928 Rilpl1   |
| ENSMUSG00000001542 | 0.003957708 | 0.045848928 Ell2     |
| ENSMUSG00000019432 | 0.003928975 | 0.045592736 Ddx39b   |
| ENSMUSG00000003541 | 0.003924507 | 0.04558913 Ier3      |
| ENSMUSG00000022706 | 0.00391802  | 0.045562049 Mrpl40   |
| ENSMUSG00000070394 | 0.003900151 | 0.045402398 Tmem256  |
| ENSMUSG00000006304 | 0.003884436 | 0.045267502 Arpc2    |
| ENSMUSG00000053644 | 0.003859918 | 0.045029643 Aldh7a1  |
| ENSMUSG00000055546 | 0.003841755 | 0.044865481 Timd4    |
| ENSMUSG00000022353 | 0.003833387 | 0.044815485 Mtss1    |
| ENSMUSG00000024007 | 0.003828546 | 0.044806657 Ppil1    |
| ENSMUSG00000044811 | 0.003811334 | 0.044652873 AF251705 |
| ENSMUSG00000032412 | 0.003786895 | 0.044414001 Atp1b3   |
| ENSMUSG00000073411 | 0.003784771 | 0.044414001 H2-D1    |
| ENSMUSG00000017764 | 0.003783566 | 0.044414001 Zswim1   |
| ENSMUSG00000003123 | 0.003781579 | 0.044414001 Lipe     |
| ENSMUSG00000039354 | 0.003779258 | 0.044414001 Smarcal1 |
| ENSMUSG00000028069 | 0.003764025 | 0.04438312 Gpatch4   |
| ENSMUSG00000036655 | 0.003754464 | 0.044318038 Colec11  |
| ENSMUSG00000037440 | 0.00373121  | 0.044091001 Vnn1     |
| ENSMUSG00000025856 | 0.003717832 | 0.043980308 Pdgfa    |
| ENSMUSG00000028964 | 0.003707987 | 0.043911219 Park7    |
| ENSMUSG00000029557 | 0.003688229 | 0.043724454 Ftsj2    |
| ENSMUSG00000067787 | 0.003668772 | 0.043540855 Bicap    |
| ENSMUSG00000034574 | 0.003659777 | 0.043481167 Daam1    |
| ENSMUSG00000023990 | 0.003652912 | 0.043446675 Tfeb     |
| ENSMUSG00000067235 | 0.003649716 | 0.043446675 H2-Q10   |
| ENSMUSG00000024397 | 0.003648387 | 0.043446675 Aif1     |
| ENSMUSG00000068267 | 0.003644973 | 0.043446675 Cenpb    |
| ENSMUSG00000060807 | 0.003638809 | 0.043446675 Serpina6 |
| ENSMUSG00000022283 | 0.003619233 | 0.04328082 Pabpc1    |
| ENSMUSG00000038522 | 0.003607096 | 0.043182768 Al317395 |
| ENSMUSG00000039208 | 0.003587762 | 0.042998254 Metrnl   |
| ENSMUSG00000030793 | 0.003580582 | 0.042959149 Pycard   |
| ENSMUSG00000021690 | 0.003578832 | 0.042959149 Jmy      |
| ENSMUSG00000068706 | 0.003568715 | 0.042910668 Gm10250  |
| ENSMUSG00000042569 | 0.003565143 | 0.042910668 Dhrr7b   |
| ENSMUSG00000008398 | 0.00355877  | 0.042885136 Elk3     |
| ENSMUSG00000038582 | 0.003543289 | 0.042745558 Pptc7    |
| ENSMUSG00000031101 | 0.003540684 | 0.042745558 Sash3    |
| ENSMUSG00000079434 | 0.003527238 | 0.042645745 Neu2     |
| ENSMUSG00000048772 | 0.003498608 | 0.042346284 Tmem53   |
| ENSMUSG00000006676 | 0.003491785 | 0.042310405 Usp19    |
| ENSMUSG00000030047 | 0.003489529 | 0.042310405 Arhgap25 |
| ENSMUSG00000025968 | 0.003488578 | 0.042310405 Ndufs1   |
| ENSMUSG00000036867 | 0.003479953 | 0.042307275 Smad6    |

|                    |             |                           |
|--------------------|-------------|---------------------------|
| ENSMUSG00000032528 | 0.003461359 | 0.042127927 Vipr1         |
| ENSMUSG00000042406 | 0.00344904  | 0.042024642 Atf4          |
| ENSMUSG00000001670 | 0.003432771 | 0.041872937 Tat           |
| ENSMUSG00000032842 | 0.003422444 | 0.041793457 Abcc10        |
| ENSMUSG00000057396 | 0.003420536 | 0.041793457 Zfp759        |
| ENSMUSG00000007891 | 0.00342003  | 0.041793457 Ctsd          |
| ENSMUSG00000035692 | 0.003416734 | 0.041793457 Isg15         |
| ENSMUSG00000046516 | 0.003416634 | 0.041793457 Cox17         |
| ENSMUSG00000024747 | 0.003415501 | 0.041793457 Aldh1a7       |
| ENSMUSG00000049807 | 0.00338239  | 0.041582163 Arhgap23      |
| ENSMUSG00000033350 | 0.003381224 | 0.041582163 Chst2         |
| ENSMUSG00000028542 | 0.003371253 | 0.041538377 Slc6a9        |
| ENSMUSG00000032060 | 0.00335636  | 0.041401401 Cryab         |
| ENSMUSG00000020823 | 0.003336261 | 0.041199813 Sec14l1       |
| ENSMUSG00000035283 | 0.003309906 | 0.040920445 Adrb1         |
| ENSMUSG00000025347 | 0.003301785 | 0.040866113 Mettl7b       |
| ENSMUSG00000030378 | 0.00329979  | 0.040866113 2810007J24Rik |
| ENSMUSG00000022314 | 0.003284521 | 0.040744411 Rad21         |
| ENSMUSG00000018821 | 0.003277897 | 0.04070829 Avpi1          |
| ENSMUSG00000072294 | 0.003267433 | 0.040624343 Klf12         |
| ENSMUSG00000090698 | 0.003262266 | 0.040606138 Apold1        |
| ENSMUSG00000030647 | 0.003259083 | 0.040606138 Ndufc2        |
| ENSMUSG00000024030 | 0.003255948 | 0.040606138 Abcg1         |
| ENSMUSG00000025498 | 0.003219025 | 0.040204815 Irf7          |
| ENSMUSG00000019988 | 0.003215589 | 0.040204815 Nedd1         |
| ENSMUSG00000033777 | 0.003212083 | 0.040204815 Tlr13         |
| ENSMUSG00000029250 | 0.003191762 | 0.04000099 Polr2b         |
| ENSMUSG00000015745 | 0.003177364 | 0.039866104 Plekho1       |
| ENSMUSG00000032079 | 0.003157752 | 0.039665419 Apoa5         |
| ENSMUSG00000030231 | 0.003154909 | 0.039665419 Plekha5       |
| ENSMUSG00000024863 | 0.003133708 | 0.039453782 Mbl2          |
| ENSMUSG00000052214 | 0.003120724 | 0.03933547 Opa3           |
| ENSMUSG00000020476 | 0.003117693 | 0.03933547 Dbnl           |
| ENSMUSG00000055737 | 0.003116592 | 0.03933547 Ghr            |
| ENSMUSG00000047547 | 0.003115753 | 0.03933547 Cltb           |
| ENSMUSG00000025499 | 0.003094107 | 0.039180114 Hras          |
| ENSMUSG00000073421 | 0.003079746 | 0.039043347 H2-Ab1        |
| ENSMUSG00000040592 | 0.003071779 | 0.038987422 Cd79b         |
| ENSMUSG00000005107 | 0.003070855 | 0.038987422 Slc2a9        |
| ENSMUSG00000095325 | 0.003065484 | 0.038987422 Zfp870        |
| ENSMUSG00000091561 | 0.003035688 | 0.038663594 Gm6665        |
| ENSMUSG00000025209 | 0.00303109  | 0.038649927 Peo1          |
| ENSMUSG00000044469 | 0.003018196 | 0.038530313 Tnfai3l1      |
| ENSMUSG00000026579 | 0.002993141 | 0.038254989 F5            |
| ENSMUSG00000010607 | 0.002981404 | 0.038149446 Pigyl         |
| ENSMUSG00000003234 | 0.002975098 | 0.038113229 Abcf3         |
| ENSMUSG00000026111 | 0.002959926 | 0.037963221 Unc50         |

|                    |             |                       |
|--------------------|-------------|-----------------------|
| ENSMUSG00000039233 | 0.002957421 | 0.037963221 Tbce      |
| ENSMUSG00000073563 | 0.002952383 | 0.037955252 Csnk1g3   |
| ENSMUSG00000021594 | 0.002945109 | 0.037906174 Srd5a1    |
| ENSMUSG00000038349 | 0.002921637 | 0.037648266 Plcl1     |
| ENSMUSG00000028464 | 0.002917328 | 0.037636963 Tpm2      |
| ENSMUSG00000025982 | 0.002916867 | 0.037636963 Sf3b1     |
| ENSMUSG00000026437 | 0.002906497 | 0.037585661 Cdk18     |
| ENSMUSG00000023905 | 0.002900342 | 0.037550357 Tnfrsf12a |
| ENSMUSG00000071151 | 0.002892152 | 0.037488582 Gm4799    |
| ENSMUSG00000031090 | 0.002890286 | 0.037488582 Nadsyn1   |
| ENSMUSG00000000594 | 0.002884225 | 0.037474419 Gm2a      |
| ENSMUSG00000023055 | 0.002881704 | 0.037474419 Calcoco1  |
| ENSMUSG00000022883 | 0.002880811 | 0.037474419 Robo1     |
| ENSMUSG00000005681 | 0.002854916 | 0.037225928 Apoa2     |
| ENSMUSG00000048277 | 0.002852263 | 0.037225928 Syng2     |
| ENSMUSG00000032702 | 0.00283987  | 0.037118019 Kank1     |
| ENSMUSG00000025144 | 0.002835235 | 0.037101655 Stra13    |
| ENSMUSG00000027459 | 0.00282003  | 0.036946774 Fam110a   |
| ENSMUSG00000033715 | 0.002814636 | 0.036920213 Akr1c14   |
| ENSMUSG00000002365 | 0.00277928  | 0.036500107 Snx9      |
| ENSMUSG00000022707 | 0.002778069 | 0.036500107 Gbe1      |
| ENSMUSG00000026126 | 0.002762    | 0.036360258 Ptpn18    |
| ENSMUSG00000039745 | 0.002742002 | 0.036140379 Htatip2   |
| ENSMUSG00000031016 | 0.002738115 | 0.036132571 Wee1      |
| ENSMUSG00000024427 | 0.00273525  | 0.036132571 Spry4     |
| ENSMUSG00000035024 | 0.002728602 | 0.03609391 Ncapd3     |
| ENSMUSG00000022387 | 0.002728042 | 0.03609391 Brd1       |
| ENSMUSG00000007594 | 0.00272497  | 0.03609391 Hapln4     |
| ENSMUSG00000026773 | 0.002718911 | 0.03609391 Pfkfb3     |
| ENSMUSG00000021939 | 0.002718286 | 0.03609391 Ctsb       |
| ENSMUSG00000028410 | 0.002689419 | 0.03579147 Dnaja1     |
| ENSMUSG00000070873 | 0.002688716 | 0.03579147 Lilra5     |
| ENSMUSG00000071633 | 0.002679727 | 0.035749253 Gm4952    |
| ENSMUSG00000001672 | 0.002678923 | 0.035749253 Marveld3  |
| ENSMUSG00000027962 | 0.002674499 | 0.035749253 Vcam1     |
| ENSMUSG00000023456 | 0.00265369  | 0.035531575 Tpi1      |
| ENSMUSG00000021866 | 0.002648923 | 0.035511118 Anxa11    |
| ENSMUSG00000038845 | 0.002647853 | 0.035511118 Phb       |
| ENSMUSG00000034880 | 0.002640547 | 0.035485589 Mrpl34    |
| ENSMUSG00000021102 | 0.002618776 | 0.035236188 Glrx5     |
| ENSMUSG00000030674 | 0.002616873 | 0.035236188 Qprt      |
| ENSMUSG00000027865 | 0.002613161 | 0.035236188 Gdap2     |
| ENSMUSG00000063704 | 0.002610473 | 0.035236188 Mapk15    |
| ENSMUSG00000092116 | 0.002608943 | 0.035236188 Gm10320   |
| ENSMUSG00000030909 | 0.002604117 | 0.035236188 Anks4b    |
| ENSMUSG00000030879 | 0.002603201 | 0.035236188 Mrpl17    |
| ENSMUSG00000024767 | 0.002564023 | 0.034798357 Otub1     |

|                    |             |                           |
|--------------------|-------------|---------------------------|
| ENSMUSG00000029810 | 0.002556266 | 0.034736076 Tmem176b      |
| ENSMUSG00000031776 | 0.002548097 | 0.034668024 Arl2bp        |
| ENSMUSG00000050335 | 0.002545069 | 0.034668024 Lgals3        |
| ENSMUSG00000029715 | 0.002545001 | 0.034668024 Pop7          |
| ENSMUSG00000026571 | 0.002541939 | 0.034668024 Dcaf6         |
| ENSMUSG00000037885 | 0.002539048 | 0.034668024 Stk35         |
| ENSMUSG00000022555 | 0.002521388 | 0.034518774 Dgat1         |
| ENSMUSG00000039195 | 0.002505294 | 0.034341323 1110008P14Rik |
| ENSMUSG00000022911 | 0.002475848 | 0.03398016 Arl13b         |
| ENSMUSG00000070044 | 0.002474019 | 0.03398016 Fam149a        |
| ENSMUSG00000020889 | 0.002469554 | 0.033978837 Nr1d1         |
| ENSMUSG00000022032 | 0.002460013 | 0.033890076 Scara5        |
| ENSMUSG00000001270 | 0.002451788 | 0.033819248 Ckb           |
| ENSMUSG00000021133 | 0.002437369 | 0.033662701 Susd6         |
| ENSMUSG00000031871 | 0.002427032 | 0.033562217 Cdh5          |
| ENSMUSG00000037190 | 0.002426127 | 0.033562217 Cyb561d2      |
| ENSMUSG00000025521 | 0.002404413 | 0.033333496 Tmem192       |
| ENSMUSG00000028089 | 0.002394679 | 0.033240567 Chd1l         |
| ENSMUSG00000037797 | 0.002383016 | 0.033120594 Adh4          |
| ENSMUSG00000027690 | 0.002374994 | 0.033050991 Slc2a2        |
| ENSMUSG00000032633 | 0.002371866 | 0.033049412 Flcn          |
| ENSMUSG00000028497 | 0.002349131 | 0.032774264 Hacd4         |
| ENSMUSG00000038174 | 0.002342854 | 0.032728333 Fam126b       |
| ENSMUSG00000031799 | 0.002332354 | 0.032623205 Tpm4          |
| ENSMUSG00000026229 | 0.002329957 | 0.032623205 Psmc1         |
| ENSMUSG00000003809 | 0.002329578 | 0.032623205 Gcdh          |
| ENSMUSG00000025934 | 0.002325827 | 0.032623205 Gsta3         |
| ENSMUSG00000014599 | 0.0023231   | 0.032623205 Csf1          |
| ENSMUSG00000063488 | 0.002318693 | 0.032623205 Zkscan7       |
| ENSMUSG00000035305 | 0.002276689 | 0.032090197 Ror1          |
| ENSMUSG00000020719 | 0.002262894 | 0.031936806 Ddx5          |
| ENSMUSG00000020309 | 0.002255555 | 0.031874254 Chac2         |
| ENSMUSG00000046687 | 0.002248099 | 0.031809872 Gm5424        |
| ENSMUSG00000098112 | 0.002224249 | 0.031513063 Bin2          |
| ENSMUSG00000041078 | 0.002214861 | 0.031420655 Grid1         |
| ENSMUSG00000043687 | 0.002214679 | 0.031420655 1190005I06Rik |
| ENSMUSG00000036775 | 0.002213789 | 0.031420655 Decr2         |
| ENSMUSG00000002812 | 0.002195632 | 0.031269222 Flii          |
| ENSMUSG00000041203 | 0.00218529  | 0.031162406 2310036O22Rik |
| ENSMUSG00000038828 | 0.002161883 | 0.030868762 Tmem214       |
| ENSMUSG00000000759 | 0.002159737 | 0.030868762 Tubgcp3       |
| ENSMUSG00000058997 | 0.002132181 | 0.030524143 Vwa8          |
| ENSMUSG00000003039 | 0.00212672  | 0.030485766 Fam32a        |
| ENSMUSG00000078348 | 0.002126252 | 0.030485766 Sf3b5         |
| ENSMUSG00000028108 | 0.002124231 | 0.030485766 Ecm1          |
| ENSMUSG00000041278 | 0.002117342 | 0.030470823 Ttc1          |
| ENSMUSG00000002885 | 0.002115468 | 0.030470823 Adgre5        |

|                    |             |                           |
|--------------------|-------------|---------------------------|
| ENSMUSG00000037826 | 0.002107363 | 0.03040703 Ppm1k          |
| ENSMUSG00000040740 | 0.002085248 | 0.030127578 Slc25a34      |
| ENSMUSG00000038668 | 0.002072373 | 0.029981055 Lpar1         |
| ENSMUSG00000075517 | 0.002057157 | 0.029800245 Cyp2d37-ps    |
| ENSMUSG00000003644 | 0.002051538 | 0.029758152 Rps6ka1       |
| ENSMUSG00000045377 | 0.002049834 | 0.029758152 Tmem88        |
| ENSMUSG00000078440 | 0.002048827 | 0.029758152 Dohh          |
| ENSMUSG00000038745 | 0.002041396 | 0.029729015 Nlrp6         |
| ENSMUSG00000049303 | 0.002040491 | 0.029729015 Syt12         |
| ENSMUSG00000079164 | 0.002039557 | 0.029729015 Tlr5          |
| ENSMUSG00000021918 | 0.002038858 | 0.029729015 Nek4          |
| ENSMUSG00000044361 | 0.002038696 | 0.029729015 BC024139      |
| ENSMUSG00000055041 | 0.002028489 | 0.029729015 Commd5        |
| ENSMUSG00000027374 | 0.002024716 | 0.029722937 Mrps5         |
| ENSMUSG00000022843 | 0.002010044 | 0.02954711 Clcn2          |
| ENSMUSG00000000049 | 0.002006883 | 0.029540237 Apoh          |
| ENSMUSG00000036110 | 0.001996327 | 0.029424358 Slc17a2       |
| ENSMUSG00000066900 | 0.001995833 | 0.029424358 Suds3         |
| ENSMUSG00000021719 | 0.001978889 | 0.029245956 Rgs7bp        |
| ENSMUSG00000004633 | 0.001973472 | 0.029205253 Chn2          |
| ENSMUSG00000026589 | 0.001963125 | 0.029091385 Sec16b        |
| ENSMUSG00000055447 | 0.001936501 | 0.028735683 Cd47          |
| ENSMUSG00000051451 | 0.001934865 | 0.028735683 Crebzf        |
| ENSMUSG00000058594 | 0.001931749 | 0.028735683 Fbxo18        |
| ENSMUSG00000022575 | 0.001931568 | 0.028735683 Gsdmd         |
| ENSMUSG00000005547 | 0.001931116 | 0.028735683 Cyp2a5        |
| ENSMUSG00000020308 | 0.0019107   | 0.02854596 Tpgs1          |
| ENSMUSG00000017969 | 0.001894431 | 0.028341521 Ptgis         |
| ENSMUSG00000021573 | 0.001891346 | 0.028334024 Tppp          |
| ENSMUSG00000027002 | 0.001890876 | 0.028334024 Nckap1        |
| ENSMUSG00000037369 | 0.001887203 | 0.028334024 Kdm6a         |
| ENSMUSG00000022809 | 0.001885411 | 0.028334024 Nr1i2         |
| ENSMUSG00000042408 | 0.001873441 | 0.028219999 Zmym6         |
| ENSMUSG00000034160 | 0.001852435 | 0.027941953 Ogt           |
| ENSMUSG00000002660 | 0.001843927 | 0.027851937 Clpp          |
| ENSMUSG00000055541 | 0.001828841 | 0.027662171 Lair1         |
| ENSMUSG00000026004 | 0.001819175 | 0.027553975 Kansl1        |
| ENSMUSG00000052133 | 0.00181819  | 0.027553975 Sema5b        |
| ENSMUSG00000095061 | 0.001815133 | 0.027553975 E030018B13Rik |
| ENSMUSG00000024213 | 0.001813724 | 0.027553975 Nudt3         |
| ENSMUSG00000073418 | 0.001812821 | 0.027553975 C4b           |
| ENSMUSG00000029263 | 0.001808079 | 0.027553975 Pigg          |
| ENSMUSG00000020133 | 0.001806861 | 0.027553975 2310011J03Rik |
| ENSMUSG00000090150 | 0.001791608 | 0.027401351 Acad11        |
| ENSMUSG00000042312 | 0.001785639 | 0.027348202 S100a13       |
| ENSMUSG00000025280 | 0.001782788 | 0.027342725 Polr3a        |
| ENSMUSG00000025937 | 0.001775546 | 0.027269807 Lactb2        |

|                    |             |                     |
|--------------------|-------------|---------------------|
| ENSMUSG00000063445 | 0.001772063 | 0.027254484 Nmral1  |
| ENSMUSG00000021000 | 0.001760015 | 0.027107202 Ctage5  |
| ENSMUSG00000044533 | 0.001759066 | 0.027107202 Rps2    |
| ENSMUSG00000057411 | 0.001756574 | 0.027107202 Fam173a |
| ENSMUSG00000079426 | 0.001739072 | 0.026897968 Arpc4   |
| ENSMUSG00000026158 | 0.001738145 | 0.026897968 Ogfrl1  |
| ENSMUSG00000063888 | 0.001736617 | 0.026897968 Rpl7l1  |
| ENSMUSG00000041577 | 0.001722597 | 0.026756379 Prelp   |
| ENSMUSG00000029369 | 0.001719539 | 0.026746757 Afm     |
| ENSMUSG00000035954 | 0.001714775 | 0.026710549 Dock4   |
| ENSMUSG00000043418 | 0.001700868 | 0.026531605 Lrit2   |
| ENSMUSG00000037740 | 0.00168563  | 0.026331363 Mrps26  |
| ENSMUSG00000020780 | 0.001681624 | 0.026306266 Srp68   |
| ENSMUSG00000027589 | 0.001680625 | 0.026306266 Pcmttd2 |
| ENSMUSG00000018983 | 0.001672661 | 0.026240909 E2f2    |
| ENSMUSG00000070780 | 0.001659043 | 0.026064563 Rbm47   |
| ENSMUSG00000022999 | 0.001651574 | 0.025984443 Lmbr1l  |
| ENSMUSG00000029695 | 0.001646822 | 0.025946914 Aass    |
| ENSMUSG00000040236 | 0.00164655  | 0.025946914 Trappc5 |
| ENSMUSG00000055730 | 0.001638147 | 0.025884618 Ces2a   |
| ENSMUSG00000025781 | 0.001636692 | 0.025884618 Atp5c1  |
| ENSMUSG00000036199 | 0.001614067 | 0.025577827 Ndufa13 |
| ENSMUSG00000052520 | 0.001600283 | 0.025396093 Cyp2j5  |
| ENSMUSG00000034108 | 0.001594592 | 0.025342453 Ccs     |
| ENSMUSG00000028044 | 0.001594096 | 0.025342453 Cks1b   |
| ENSMUSG00000079487 | 0.001578266 | 0.025155906 Med12   |
| ENSMUSG00000021823 | 0.001569914 | 0.02505921 Vcl      |
| ENSMUSG00000026368 | 0.001558843 | 0.024918772 F13b    |
| ENSMUSG00000024507 | 0.001543684 | 0.024712461 Hsd17b4 |
| ENSMUSG00000039652 | 0.00153849  | 0.024665323 Cpeb3   |
| ENSMUSG00000019370 | 0.001536113 | 0.024663276 Calm3   |
| ENSMUSG00000071078 | 0.001527518 | 0.024561238 Nr2c2ap |
| ENSMUSG00000067825 | 0.001523088 | 0.02452597 Pex26    |
| ENSMUSG00000017677 | 0.00152005  | 0.024513035 Wsb1    |
| ENSMUSG00000005873 | 0.001519882 | 0.024513035 Reep5   |
| ENSMUSG00000035936 | 0.00151375  | 0.024483462 Aldh5a1 |
| ENSMUSG00000040913 | 0.001498029 | 0.024264969 Fbxw4   |
| ENSMUSG00000032897 | 0.001493004 | 0.024219351 Nfyc    |
| ENSMUSG00000002833 | 0.001491373 | 0.024219351 Hdgfrp2 |
| ENSMUSG00000028550 | 0.001487068 | 0.024194641 Atg4c   |
| ENSMUSG00000067225 | 0.001482124 | 0.024150031 Cyp2c54 |
| ENSMUSG00000061175 | 0.001478518 | 0.024127121 Fnip2   |
| ENSMUSG00000004655 | 0.00146983  | 0.024021093 Aqp1    |
| ENSMUSG00000026662 | 0.001468644 | 0.024021093 Sephs1  |
| ENSMUSG00000025647 | 0.001452341 | 0.023806243 Shisa5  |
| ENSMUSG00000044080 | 0.001452164 | 0.023806243 S100a1  |
| ENSMUSG00000070594 | 0.001440268 | 0.023679129 Gm4788  |

|                    |             |                           |
|--------------------|-------------|---------------------------|
| ENSMUSG00000025044 | 0.001439825 | 0.023679129 Msr1          |
| ENSMUSG00000023921 | 0.001436539 | 0.023679129 Mut           |
| ENSMUSG00000015112 | 0.001435566 | 0.023679129 Slc25a13      |
| ENSMUSG00000026939 | 0.001435073 | 0.023679129 Tmem141       |
| ENSMUSG00000030643 | 0.001434982 | 0.023679129 Rab30         |
| ENSMUSG00000022831 | 0.001434521 | 0.023679129 Hcls1         |
| ENSMUSG00000057400 | 0.001419959 | 0.023592832 Ces1c         |
| ENSMUSG00000048217 | 0.001416784 | 0.023575808 Nags          |
| ENSMUSG00000006333 | 0.001407361 | 0.023454586 Rps9          |
| ENSMUSG00000041057 | 0.001401562 | 0.023393494 Wdr43         |
| ENSMUSG00000019763 | 0.001384918 | 0.023150936 Rmnd1         |
| ENSMUSG00000006538 | 0.001379592 | 0.023097112 Ihh           |
| ENSMUSG00000038880 | 0.001373472 | 0.023029815 Mrps34        |
| ENSMUSG00000038503 | 0.001373462 | 0.023029815 Mesdc2        |
| ENSMUSG00000021676 | 0.001363197 | 0.022927635 Iqgap2        |
| ENSMUSG00000055652 | 0.001349163 | 0.022726454 Klhl25        |
| ENSMUSG00000043740 | 0.001335454 | 0.022530139 B430306N03Rik |
| ENSMUSG00000006442 | 0.001333737 | 0.022530139 Srm           |
| ENSMUSG00000096145 | 0.001322802 | 0.022385569 Vkorc1        |
| ENSMUSG00000024338 | 0.001322759 | 0.022385569 Psmb8         |
| ENSMUSG00000044876 | 0.001320922 | 0.022385569 Zfp444        |
| ENSMUSG00000074227 | 0.001320451 | 0.022385569 Spint2        |
| ENSMUSG00000021591 | 0.00131597  | 0.022385569 Glrx          |
| ENSMUSG00000020781 | 0.001314419 | 0.022385569 Tsen54        |
| ENSMUSG00000050270 | 0.001311783 | 0.022385569 Tmem220       |
| ENSMUSG00000038418 | 0.00125893  | 0.021537334 Egr1          |
| ENSMUSG00000045438 | 0.001247486 | 0.021374885 Cox19         |
| ENSMUSG00000049580 | 0.001241233 | 0.021301028 Tsku          |
| ENSMUSG00000029163 | 0.001239249 | 0.021300316 Emilin1       |
| ENSMUSG00000030691 | 0.001235251 | 0.02126493 Fchsd2         |
| ENSMUSG00000003380 | 0.001234528 | 0.02126493 Rabac1         |
| ENSMUSG00000051495 | 0.001226354 | 0.021178272 Irf2bp2       |
| ENSMUSG00000049625 | 0.001219132 | 0.02108675 Tifab          |
| ENSMUSG00000032554 | 0.001210388 | 0.020968582 Trf           |
| ENSMUSG00000005677 | 0.001208585 | 0.020968582 Nr1i3         |
| ENSMUSG00000002475 | 0.001207663 | 0.020968582 Abhd3         |
| ENSMUSG00000021789 | 0.001206687 | 0.020968582 Sftpa1        |
| ENSMUSG00000068086 | 0.001197657 | 0.020879972 Cyp2d9        |
| ENSMUSG00000032050 | 0.001195487 | 0.020875337 Rdx           |
| ENSMUSG00000038387 | 0.001193646 | 0.020875337 Rras          |
| ENSMUSG00000042275 | 0.001191131 | 0.020865731 Pelo          |
| ENSMUSG00000019935 | 0.001187074 | 0.020827931 Slc17a8       |
| ENSMUSG00000049878 | 0.001175892 | 0.02066479 Rlf            |
| ENSMUSG00000020385 | 0.001175519 | 0.02066479 Clk4           |
| ENSMUSG00000005656 | 0.001174388 | 0.02066479 Snx6           |
| ENSMUSG00000022562 | 0.00116934  | 0.020648933 Oplah         |
| ENSMUSG00000031889 | 0.001169076 | 0.020648933 D230025D16Rik |

|                    |             |                           |
|--------------------|-------------|---------------------------|
| ENSMUSG00000015120 | 0.00116181  | 0.020582238 Ube2i         |
| ENSMUSG00000049124 | 0.001159789 | 0.020579681 Gm8186        |
| ENSMUSG00000019189 | 0.001157049 | 0.020564336 Rnf145        |
| ENSMUSG00000002831 | 0.001154328 | 0.020549282 Plin4         |
| ENSMUSG00000039117 | 0.001154177 | 0.020549282 Taf4a         |
| ENSMUSG00000041827 | 0.001148617 | 0.020514233 Oasl1         |
| ENSMUSG00000017453 | 0.001124949 | 0.020124296 Pipox         |
| ENSMUSG00000026295 | 0.001119326 | 0.020056418 Spp2          |
| ENSMUSG00000079547 | 0.001118398 | 0.020056418 H2-DMb1       |
| ENSMUSG00000044340 | 0.001115938 | 0.020056418 Phlpp1        |
| ENSMUSG00000062232 | 0.001113636 | 0.020052761 Rapgef2       |
| ENSMUSG00000025194 | 0.001108213 | 0.019987942 Abcc2         |
| ENSMUSG00000032575 | 0.001107071 | 0.019987942 Manf          |
| ENSMUSG00000045680 | 0.001106552 | 0.019987942 Tcf21         |
| ENSMUSG00000025584 | 0.001095102 | 0.019849395 Pde8a         |
| ENSMUSG00000029328 | 0.001085014 | 0.019699109 Hnrnpdl       |
| ENSMUSG00000024158 | 0.001083865 | 0.019699109 Hagh          |
| ENSMUSG00000053604 | 0.001077186 | 0.019621957 Rpia          |
| ENSMUSG00000013698 | 0.001075348 | 0.019621082 Pea15a        |
| ENSMUSG00000000088 | 0.001068105 | 0.019521392 Cox5a         |
| ENSMUSG00000050721 | 0.00105796  | 0.019368255 Plekho2       |
| ENSMUSG00000023206 | 0.001048167 | 0.01922107 Il15ra         |
| ENSMUSG00000029513 | 0.001040576 | 0.019113825 Prkab1        |
| ENSMUSG00000005580 | 0.001038486 | 0.019107444 Adcy9         |
| ENSMUSG00000034786 | 0.001036761 | 0.019107444 Gpsm3         |
| ENSMUSG00000018340 | 0.00103664  | 0.019107444 Anxa6         |
| ENSMUSG00000033436 | 0.001029548 | 0.019038819 Armcx2        |
| ENSMUSG00000038781 | 0.001025389 | 0.018993942 Stap2         |
| ENSMUSG00000029670 | 0.001021339 | 0.018950937 Ing3          |
| ENSMUSG00000044408 | 0.001018342 | 0.018927348 Sptssa        |
| ENSMUSG00000047284 | 0.001013954 | 0.0188778 Neurl4          |
| ENSMUSG00000036151 | 0.001010321 | 0.018842139 Tm6sf2        |
| ENSMUSG00000070284 | 0.001003873 | 0.018753776 Gmppb         |
| ENSMUSG00000021423 | 0.000996212 | 0.018642418 Ly86          |
| ENSMUSG00000043065 | 0.000973266 | 0.018244158 Spice1        |
| ENSMUSG00000040536 | 0.00096023  | 0.018030611 Necab1        |
| ENSMUSG00000046245 | 0.000959639 | 0.018030611 Pilra         |
| ENSMUSG00000090394 | 0.000955938 | 0.018011712 4930523C07Rik |
| ENSMUSG00000021624 | 0.000950699 | 0.01794383 Cd180          |
| ENSMUSG00000023988 | 0.000950684 | 0.01794383 Bysl           |
| ENSMUSG00000045672 | 0.000948105 | 0.01794383 Col27a1        |
| ENSMUSG00000022174 | 0.000946623 | 0.01794383 Dad1           |
| ENSMUSG00000023286 | 0.000945419 | 0.01794383 Ube2j2         |
| ENSMUSG00000034932 | 0.000939907 | 0.017894137 Mrpl54        |
| ENSMUSG00000026104 | 0.000935387 | 0.017839055 Stat1         |
| ENSMUSG00000006241 | 0.000934524 | 0.017839055 Ccdc159       |
| ENSMUSG00000038773 | 0.000934053 | 0.017839055 Kdm3b         |

|                     |             |                       |
|---------------------|-------------|-----------------------|
| ENSMUSG00000026781  | 0.000932226 | 0.017839055 Acbd5     |
| ENSMUSG00000034509  | 0.000930154 | 0.017839055 Mad2l1bp  |
| ENSMUSG00000039956  | 0.000929067 | 0.017839055 Mrap      |
| ENSMUSG00000002679  | 0.000928509 | 0.017839055 Med6      |
| ENSMUSG00000041550  | 0.000924892 | 0.017839055 Serpina5  |
| ENSMUSG00000022336  | 0.000923342 | 0.017839055 Eif3e     |
| ENSMUSG00000024014  | 0.000918532 | 0.017796144 Pim1      |
| ENSMUSG00000026417  | 0.000918306 | 0.017796144 Pigr      |
| ENSMUSG00000005268  | 0.000917899 | 0.017796144 Prlr      |
| ENSMUSG00000033308  | 0.000888581 | 0.017307607 Dpyd      |
| ENSMUSG00000013822  | 0.000885192 | 0.017272277 Elof1     |
| ENSMUSG00000038178  | 0.000876392 | 0.017131046 Slc43a2   |
| ENSMUSG00000028986  | 0.000869684 | 0.017030275 Klhl7     |
| ENSMUSG00000034168  | 0.00086732  | 0.017014367 Irf2bpl   |
| ENSMUSG00000050212  | 0.000861114 | 0.016922901 Eva1b     |
| ENSMUSG00000066361  | 0.000858584 | 0.016903478 Serpina3c |
| ENSMUSG00000038014  | 0.000855631 | 0.016875633 Fam120a   |
| ENSMUSG00000070697  | 0.000853054 | 0.016855123 Utp3      |
| ENSMUSG00000023262  | 0.000852117 | 0.016855123 Acy1      |
| ENSMUSG000000089715 | 0.000851549 | 0.016855123 Cbx6      |
| ENSMUSG00000024927  | 0.000849601 | 0.016855123 Rela      |
| ENSMUSG00000054827  | 0.000839501 | 0.016707738 Cyp2c50   |
| ENSMUSG00000003053  | 0.000838272 | 0.016707738 Cyp2c29   |
| ENSMUSG00000045667  | 0.000834631 | 0.01667134 Smtnl2     |
| ENSMUSG00000025279  | 0.000824786 | 0.016504747 Dnase1l3  |
| ENSMUSG00000030499  | 0.000811451 | 0.016267585 Kctd15    |
| ENSMUSG00000001891  | 0.000806529 | 0.016198523 Ugp2      |
| ENSMUSG00000018417  | 0.000805018 | 0.016197846 Myo1b     |
| ENSMUSG00000029148  | 0.000800495 | 0.016136441 Nrbp1     |
| ENSMUSG00000022472  | 0.000788201 | 0.015917888 Desi1     |
| ENSMUSG00000047909  | 0.000786253 | 0.015907842 Ankrd16   |
| ENSMUSG00000032491  | 0.000784121 | 0.015894021 Nradd     |
| ENSMUSG00000028194  | 0.000777662 | 0.015792291 Ddah1     |
| ENSMUSG00000044786  | 0.000775929 | 0.015786333 Zfp36     |
| ENSMUSG00000015970  | 0.000773525 | 0.015766683 Chdh      |
| ENSMUSG00000024556  | 0.000772501 | 0.015766683 Me2       |
| ENSMUSG00000031775  | 0.000764907 | 0.015649206 Plip      |
| ENSMUSG00000022899  | 0.000757673 | 0.015530181 Slc15a2   |
| ENSMUSG00000032294  | 0.000757614 | 0.015530181 Pkm       |
| ENSMUSG00000015355  | 0.000753301 | 0.015498488 Cd48      |
| ENSMUSG00000054545  | 0.000745755 | 0.015372082 Ugt1a6a   |
| ENSMUSG00000061171  | 0.000741388 | 0.015310846 Slc38a11  |
| ENSMUSG00000028478  | 0.000736769 | 0.015244163 Clta      |
| ENSMUSG00000025969  | 0.00073476  | 0.015231346 Nrp2      |
| ENSMUSG000000089847 | 0.000728206 | 0.01512406 Timm10b    |
| ENSMUSG00000031549  | 0.000727226 | 0.01512406 Ido2       |
| ENSMUSG00000057880  | 0.000726474 | 0.01512406 Abat       |

|                    |             |                      |
|--------------------|-------------|----------------------|
| ENSMUSG00000052397 | 0.000726073 | 0.01512406 Ezr       |
| ENSMUSG00000035863 | 0.000725713 | 0.01512406 Palm      |
| ENSMUSG00000063696 | 0.000722114 | 0.01512406 Gm8730    |
| ENSMUSG00000022462 | 0.00071976  | 0.015120474 Slc38a2  |
| ENSMUSG00000079017 | 0.000690138 | 0.014526007 Ifi27l2a |
| ENSMUSG00000022285 | 0.000685842 | 0.014463349 Ywhaz    |
| ENSMUSG00000022742 | 0.000682647 | 0.014423703 Cpox     |
| ENSMUSG00000028967 | 0.000670533 | 0.014195103 Errfi1   |
| ENSMUSG00000060032 | 0.000656547 | 0.013925902 H2afj    |
| ENSMUSG00000030830 | 0.000656125 | 0.013925902 Itgal    |
| ENSMUSG00000021958 | 0.000650481 | 0.013850814 Pinx1    |
| ENSMUSG00000025732 | 0.00064902  | 0.013846596 Fam195a  |
| ENSMUSG00000038156 | 0.000648645 | 0.013846596 Spon1    |
| ENSMUSG00000022538 | 0.000646478 | 0.013846243 Lsg1     |
| ENSMUSG00000033697 | 0.000642763 | 0.013793622 Arhgap39 |
| ENSMUSG00000060063 | 0.000640166 | 0.013764815 Alox5ap  |
| ENSMUSG00000090124 | 0.000637176 | 0.013727457 Ugt1a7c  |
| ENSMUSG00000017774 | 0.000630847 | 0.013617844 Myo1c    |
| ENSMUSG00000044709 | 0.000621443 | 0.013441301 Gemin7   |
| ENSMUSG00000023982 | 0.00062102  | 0.013441301 Guca1a   |
| ENSMUSG00000030470 | 0.00062072  | 0.013441301 Csrp3    |
| ENSMUSG00000071654 | 0.000617646 | 0.013438703 Uqcc3    |
| ENSMUSG00000005510 | 0.000607003 | 0.013233379 Ndufs3   |
| ENSMUSG00000037499 | 0.000606862 | 0.013233379 Nenf     |
| ENSMUSG00000079941 | 0.000603832 | 0.013216817 Gm11273  |
| ENSMUSG00000010122 | 0.000602317 | 0.013210025 Slc47a1  |
| ENSMUSG00000018593 | 0.000600499 | 0.013196532 Sparc    |
| ENSMUSG00000079484 | 0.000599501 | 0.013196532 Phyhd1   |
| ENSMUSG00000045752 | 0.00059903  | 0.013196532 Tssc4    |
| ENSMUSG00000020228 | 0.000592384 | 0.013096949 Helb     |
| ENSMUSG00000005354 | 0.000584502 | 0.012948781 Txn2     |
| ENSMUSG00000064225 | 0.000576635 | 0.012800363 Paqr9    |
| ENSMUSG00000019539 | 0.000576278 | 0.012800363 Rcn3     |
| ENSMUSG00000048546 | 0.000575113 | 0.012800363 Tob2     |
| ENSMUSG00000028248 | 0.000572552 | 0.012787386 Pnir     |
| ENSMUSG00000037709 | 0.000562384 | 0.012585928 Fam13a   |
| ENSMUSG00000035357 | 0.000559008 | 0.012535944 Pdzn3    |
| ENSMUSG00000030359 | 0.000557503 | 0.012527823 Pzp      |
| ENSMUSG00000022388 | 0.00055735  | 0.012527823 Ttl8     |
| ENSMUSG00000067219 | 0.000557255 | 0.012527823 Nipal1   |
| ENSMUSG00000020604 | 0.000556518 | 0.012527823 Arsg     |
| ENSMUSG00000020265 | 0.000555209 | 0.012527823 Sumo3    |
| ENSMUSG00000072115 | 0.000551551 | 0.012522368 Ang      |
| ENSMUSG00000034173 | 0.0005503   | 0.0125199 Zbed5      |
| ENSMUSG00000045503 | 0.000549704 | 0.0125199 Sys1       |
| ENSMUSG00000040618 | 0.000547816 | 0.012515304 Pck2     |
| ENSMUSG00000041272 | 0.000546981 | 0.012515304 Tox      |

|                    |             |                           |
|--------------------|-------------|---------------------------|
| ENSMUSG00000020423 | 0.000543522 | 0.012469167 Btg2          |
| ENSMUSG00000029007 | 0.000542036 | 0.012461136 Agrap         |
| ENSMUSG00000020102 | 0.000541599 | 0.012461136 Slc16a7       |
| ENSMUSG00000000555 | 0.000538711 | 0.012436858 Itga5         |
| ENSMUSG00000094786 | 0.000535967 | 0.012399603 Gm14403       |
| ENSMUSG00000032350 | 0.000535376 | 0.012399603 Gclc          |
| ENSMUSG00000040471 | 0.000534712 | 0.012399603 Ggt6          |
| ENSMUSG00000015889 | 0.000532258 | 0.01239224 Lta4h          |
| ENSMUSG00000025405 | 0.000524922 | 0.012247438 Inhbc         |
| ENSMUSG00000022760 | 0.000523104 | 0.012231052 Thap7         |
| ENSMUSG00000060586 | 0.000519769 | 0.012179036 H2-Eb1        |
| ENSMUSG00000024425 | 0.000514778 | 0.012087924 Ndfip1        |
| ENSMUSG00000024410 | 0.000509643 | 0.011993015 3110002H16Rik |
| ENSMUSG00000045094 | 0.000506585 | 0.011946694 Arhgef37      |
| ENSMUSG00000062619 | 0.00050415  | 0.011914884 2310039H08Rik |
| ENSMUSG00000007850 | 0.000502389 | 0.011898921 Hnrnp1        |
| ENSMUSG00000072582 | 0.000496332 | 0.011780902 Ptrh2         |
| ENSMUSG00000045775 | 0.000494648 | 0.011766399 Slc16a5       |
| ENSMUSG00000028034 | 0.000493781 | 0.011766399 Fubp1         |
| ENSMUSG00000051184 | 0.000487636 | 0.011650138 Zfp524        |
| ENSMUSG00000049907 | 0.000481938 | 0.011539143 Rasl11b       |
| ENSMUSG00000019158 | 0.000479663 | 0.011509804 Tmem160       |
| ENSMUSG00000019944 | 0.000477646 | 0.011486544 Rhobtb1       |
| ENSMUSG00000037594 | 0.000477367 | 0.011486544 BC022687      |
| ENSMUSG00000018796 | 0.000476403 | 0.011486544 Acs1          |
| ENSMUSG00000032786 | 0.000468231 | 0.011334705 Alas1         |
| ENSMUSG00000021193 | 0.000467236 | 0.011334705 Pitrm1        |
| ENSMUSG00000054716 | 0.000466529 | 0.011334705 Zfp771        |
| ENSMUSG00000000056 | 0.000463016 | 0.011283174 Narf          |
| ENSMUSG00000026839 | 0.000461646 | 0.011274852 Upp2          |
| ENSMUSG00000024228 | 0.000458173 | 0.011214999 Nudt12        |
| ENSMUSG00000035342 | 0.00045807  | 0.011214999 Lzts2         |
| ENSMUSG00000034744 | 0.000457409 | 0.011214999 Nagk          |
| ENSMUSG00000034190 | 0.000457402 | 0.011214999 Chmp7         |
| ENSMUSG00000037149 | 0.000454407 | 0.011214999 Ddx1          |
| ENSMUSG00000021495 | 0.000454045 | 0.011214999 Fam193b       |
| ENSMUSG00000032966 | 0.000453041 | 0.011214999 Fkbp1a        |
| ENSMUSG00000032293 | 0.000448649 | 0.011156204 Ireb2         |
| ENSMUSG00000025871 | 0.000448502 | 0.011156204 4833439L19Rik |
| ENSMUSG00000030536 | 0.000446807 | 0.011156204 Iqgap1        |
| ENSMUSG00000071551 | 0.000442474 | 0.011078014 Akr1c19       |
| ENSMUSG00000028811 | 0.000435992 | 0.010940712 Yars          |
| ENSMUSG00000031451 | 0.000432767 | 0.010884689 Gas6          |
| ENSMUSG00000044645 | 0.000431187 | 0.010869873 Gm7334        |
| ENSMUSG00000040441 | 0.000429477 | 0.010851724 Slc26a10      |
| ENSMUSG00000020777 | 0.000428172 | 0.01084372 Acox1          |
| ENSMUSG00000033845 | 0.000423317 | 0.010745592 Mrpl15        |

|                    |             |                       |
|--------------------|-------------|-----------------------|
| ENSMUSG00000062960 | 0.000421636 | 0.010727744 Kdr       |
| ENSMUSG00000052160 | 0.000420564 | 0.010725364 Pld4      |
| ENSMUSG00000022253 | 0.000419482 | 0.010722702 Nadk2     |
| ENSMUSG00000032263 | 0.000417426 | 0.010695086 Bckdhb    |
| ENSMUSG00000015568 | 0.000413115 | 0.010609405 Lpl       |
| ENSMUSG00000032915 | 0.000411232 | 0.010585849 Adgre4    |
| ENSMUSG00000017718 | 0.000409891 | 0.010576141 Afmid     |
| ENSMUSG00000017418 | 0.00039796  | 0.01029252 Arl5b      |
| ENSMUSG00000025980 | 0.000393218 | 0.010193911 Hspd1     |
| ENSMUSG00000020850 | 0.000389073 | 0.010110377 Prpf8     |
| ENSMUSG00000006575 | 0.000385621 | 0.01004446 Rundc3a    |
| ENSMUSG00000056501 | 0.00037873  | 0.009888452 Cebp      |
| ENSMUSG00000070493 | 0.000377271 | 0.009873887 Chchd2    |
| ENSMUSG00000079015 | 0.000377252 | 0.009873887 Serpina1c |
| ENSMUSG00000022180 | 0.000375559 | 0.009873887 Slc7a8    |
| ENSMUSG00000004098 | 0.000373828 | 0.00985431 Col5a3     |
| ENSMUSG00000028186 | 0.000369826 | 0.009772317 Uox       |
| ENSMUSG00000024959 | 0.000367354 | 0.009730456 Bad       |
| ENSMUSG00000068631 | 0.000366883 | 0.009730456 Gm7676    |
| ENSMUSG00000059447 | 0.000365831 | 0.009730456 Hadhb     |
| ENSMUSG00000048371 | 0.000361785 | 0.009652871 Pdp2      |
| ENSMUSG00000021208 | 0.000351405 | 0.009398801 Ifi27l2b  |
| ENSMUSG00000089736 | 0.000344277 | 0.009230667 Tgfbr3l   |
| ENSMUSG00000051483 | 0.000343402 | 0.009229775 Cbr1      |
| ENSMUSG00000060152 | 0.000340902 | 0.009185096 Pop5      |
| ENSMUSG00000026199 | 0.000338924 | 0.009154289 Ankzf1    |
| ENSMUSG00000021238 | 0.000338662 | 0.009154289 Aldh6a1   |
| ENSMUSG00000011263 | 0.000335533 | 0.009107551 Exoc3l2   |
| ENSMUSG00000055493 | 0.000331669 | 0.009025005 Epm2a     |
| ENSMUSG00000027364 | 0.000324558 | 0.008853478 Usp50     |
| ENSMUSG00000090145 | 0.000324233 | 0.008853478 Ugt1a6b   |
| ENSMUSG00000038594 | 0.000317592 | 0.008706782 Cep85l    |
| ENSMUSG00000006731 | 0.000315865 | 0.008681135 B4galnt1  |
| ENSMUSG00000037780 | 0.000312873 | 0.008620527 Mbl1      |
| ENSMUSG00000032092 | 0.00031234  | 0.008620527 Mpzl2     |
| ENSMUSG00000020290 | 0.000306121 | 0.008477079 Xpo1      |
| ENSMUSG00000074997 | 0.00030053  | 0.008343323 Pin1rt1   |
| ENSMUSG00000042985 | 0.000300529 | 0.008343323 Upk3b     |
| ENSMUSG00000024608 | 0.000297701 | 0.008306854 Rps14     |
| ENSMUSG00000031633 | 0.000296597 | 0.008297154 Slc25a4   |
| ENSMUSG00000033107 | 0.000292893 | 0.008214487 Rnf125    |
| ENSMUSG00000031917 | 0.000289386 | 0.008136949 Nip7      |
| ENSMUSG00000067924 | 0.000288496 | 0.008132763 Cxx1b     |
| ENSMUSG00000038550 | 0.000288259 | 0.008132763 Ciart     |
| ENSMUSG00000024610 | 0.000287949 | 0.008132763 Cd74      |
| ENSMUSG00000020653 | 0.000285077 | 0.008098855 Klf11     |
| ENSMUSG00000036748 | 0.000280613 | 0.007992732 Cuedc2    |

|                    |             |                           |
|--------------------|-------------|---------------------------|
| ENSMUSG00000034259 | 0.000280459 | 0.007992732 Exosc4        |
| ENSMUSG00000068523 | 0.00027667  | 0.00792158 Gng5           |
| ENSMUSG00000045930 | 0.000275747 | 0.007915808 Clec14a       |
| ENSMUSG00000021039 | 0.000268692 | 0.007733529 Snw1          |
| ENSMUSG00000026239 | 0.000268448 | 0.007733529 Pde6d         |
| ENSMUSG00000025453 | 0.000267646 | 0.007733529 Nnt           |
| ENSMUSG00000022040 | 0.000267561 | 0.007733529 Ephx2         |
| ENSMUSG00000006057 | 0.000265404 | 0.007719941 Atp5g1        |
| ENSMUSG00000087141 | 0.000264686 | 0.007719541 Plcx2         |
| ENSMUSG00000034903 | 0.000261348 | 0.007642509 Cobll1        |
| ENSMUSG00000018927 | 0.000254721 | 0.007468639 Ccl6          |
| ENSMUSG00000048087 | 0.000252623 | 0.00742698 Gm4737         |
| ENSMUSG00000062822 | 0.000248797 | 0.007334162 4833420G17Rik |
| ENSMUSG00000033379 | 0.000245589 | 0.007259122 Atp6v0b       |
| ENSMUSG00000043681 | 0.000239476 | 0.007097538 Fam25c        |
| ENSMUSG00000035878 | 0.000230746 | 0.006857348 Hykk          |
| ENSMUSG00000032553 | 0.000222978 | 0.006644516 Srprb         |
| ENSMUSG00000046718 | 0.000220309 | 0.006582861 Bst2          |
| ENSMUSG00000031886 | 0.000218781 | 0.006555069 Ces2e         |
| ENSMUSG00000052270 | 0.000217093 | 0.006522319 Fpr2          |
| ENSMUSG00000073700 | 0.000216832 | 0.006522319 Klhl21        |
| ENSMUSG00000026712 | 0.000215497 | 0.00651003 Mrc1           |
| ENSMUSG00000020592 | 0.000214205 | 0.00648888 Sdc1           |
| ENSMUSG00000030244 | 0.000212329 | 0.006449848 Gys2          |
| ENSMUSG00000032372 | 0.000212245 | 0.006449848 Plscr2        |
| ENSMUSG00000036114 | 0.000211826 | 0.006449848 Rpp25l        |
| ENSMUSG00000040660 | 0.000211052 | 0.006449848 Cyp2b9        |
| ENSMUSG00000061825 | 0.000210137 | 0.006449848 Ces2c         |
| ENSMUSG00000074264 | 0.00020903  | 0.006438842 Amy1          |
| ENSMUSG00000006519 | 0.000208091 | 0.006427953 Cyba          |
| ENSMUSG00000042190 | 0.000206987 | 0.00641192 Cmk1r1         |
| ENSMUSG00000026411 | 0.000205672 | 0.006389247 Tmem9         |
| ENSMUSG00000004035 | 0.000205108 | 0.006389247 Gstm7         |
| ENSMUSG00000070473 | 0.00019883  | 0.006211871 Cldn3         |
| ENSMUSG00000029447 | 0.000197897 | 0.006200395 Cct6a         |
| ENSMUSG00000020034 | 0.000196986 | 0.006189524 Tcp11l2       |
| ENSMUSG00000056978 | 0.000193034 | 0.006082778 Hamp2         |
| ENSMUSG00000029066 | 0.000188587 | 0.005959796 Mrpl20        |
| ENSMUSG00000026548 | 0.000188079 | 0.005959796 Slamf9        |
| ENSMUSG00000026857 | 0.000185603 | 0.00589948 Ntmt1          |
| ENSMUSG00000041355 | 0.000184537 | 0.005882638 Ssr2          |
| ENSMUSG00000049044 | 0.000183736 | 0.005874205 Rapgef4       |
| ENSMUSG00000033624 | 0.000183723 | 0.005874205 Pdpr          |
| ENSMUSG00000021264 | 0.000182544 | 0.005870323 Yy1           |
| ENSMUSG00000034881 | 0.000181623 | 0.005857866 Tbx2r         |
| ENSMUSG00000075701 | 0.000181437 | 0.005857866 Vimp          |
| ENSMUSG00000021127 | 0.000180013 | 0.005840314 Zfp36l1       |

|                    |             |                       |
|--------------------|-------------|-----------------------|
| ENSMUSG00000036615 | 0.000179335 | 0.005835587 Rfxap     |
| ENSMUSG00000049037 | 0.0001758   | 0.005737582 Clec4a1   |
| ENSMUSG00000024570 | 0.00017551  | 0.005737582 Rbfa      |
| ENSMUSG00000022974 | 0.000170029 | 0.005582458 Paxbp1    |
| ENSMUSG00000048731 | 0.000169183 | 0.005571356 Ggnbp1    |
| ENSMUSG00000047036 | 0.000168471 | 0.005564633 Zfp445    |
| ENSMUSG00000032518 | 0.00016231  | 0.005377329 Rpsa      |
| ENSMUSG00000026641 | 0.000160458 | 0.005332056 Usf1      |
| ENSMUSG00000061111 | 0.000158202 | 0.00527307 Fam195b    |
| ENSMUSG00000030815 | 0.000157871 | 0.00527307 Phkg2      |
| ENSMUSG00000042462 | 0.000156354 | 0.005243358 Dctpp1    |
| ENSMUSG00000047793 | 0.000152993 | 0.005146381 Sned1     |
| ENSMUSG00000020321 | 0.000150191 | 0.005067689 Mdh1      |
| ENSMUSG00000031431 | 0.000150156 | 0.005067689 Tsc22d3   |
| ENSMUSG00000038312 | 0.000148942 | 0.005056667 Edem2     |
| ENSMUSG00000037266 | 0.000148911 | 0.005056667 Rsrp1     |
| ENSMUSG00000059498 | 0.000145695 | 0.00497722 Fcgr3      |
| ENSMUSG00000034783 | 0.000145184 | 0.004975269 Cd207     |
| ENSMUSG00000032548 | 0.000144635 | 0.004971986 Slco2a1   |
| ENSMUSG00000031561 | 0.000144098 | 0.004969101 Tenm3     |
| ENSMUSG00000029299 | 0.000143109 | 0.004950569 Abcg3     |
| ENSMUSG00000026082 | 0.000142739 | 0.004950569 Rev1      |
| ENSMUSG00000027765 | 0.00014236  | 0.004950569 P2ry1     |
| ENSMUSG00000019710 | 0.000142139 | 0.004950569 Mrpl24    |
| ENSMUSG00000018727 | 0.000137744 | 0.004825884 Cpsf4l    |
| ENSMUSG00000036362 | 0.000137229 | 0.004823234 P2ry13    |
| ENSMUSG00000000739 | 0.000135013 | 0.004760618 Sult5a1   |
| ENSMUSG00000074129 | 0.000133159 | 0.004710394 Rpl13a    |
| ENSMUSG00000025854 | 0.000132625 | 0.004706695 Fam20c    |
| ENSMUSG00000002032 | 0.000131389 | 0.004677948 Tmem25    |
| ENSMUSG00000071715 | 0.000129487 | 0.004625254 Ncf4      |
| ENSMUSG00000072849 | 0.000128508 | 0.004605278 Serpina1e |
| ENSMUSG00000030795 | 0.000128244 | 0.004605278 Fus       |
| ENSMUSG00000026399 | 0.000126088 | 0.004548308 Cd55      |
| ENSMUSG00000022178 | 0.000123082 | 0.004454504 Ajuba     |
| ENSMUSG00000053964 | 0.00012244  | 0.004445955 Lgals4    |
| ENSMUSG00000061353 | 0.000121708 | 0.00443404 Cxcl12     |
| ENSMUSG00000074622 | 0.000121704 | 0.00443404 Mafb       |
| ENSMUSG00000035356 | 0.000121443 | 0.00443404 Nfkbiz     |
| ENSMUSG00000034353 | 0.00011985  | 0.00441031 Ramp1      |
| ENSMUSG00000059908 | 0.000118463 | 0.004373963 Mug1      |
| ENSMUSG00000050299 | 0.000117424 | 0.004350255 Gm9843    |
| ENSMUSG00000026034 | 0.000115223 | 0.004283186 Clk1      |
| ENSMUSG00000025428 | 0.000114756 | 0.004280311 Atp5a1    |
| ENSMUSG00000020865 | 0.000114504 | 0.004280311 Abcc3     |
| ENSMUSG00000030474 | 0.000114418 | 0.004280311 Siglece   |
| ENSMUSG00000017446 | 0.000113897 | 0.004280311 C1qtnf1   |

|                    |             |                           |
|--------------------|-------------|---------------------------|
| ENSMUSG00000027340 | 0.000112489 | 0.004253654 Slc23a2       |
| ENSMUSG00000050777 | 0.000112475 | 0.004253654 Tmem37        |
| ENSMUSG00000042622 | 0.00011131  | 0.004238266 Maff          |
| ENSMUSG00000020069 | 0.000109005 | 0.004164969 Hnrnp3        |
| ENSMUSG00000030516 | 0.000107303 | 0.004114288 Tjp1          |
| ENSMUSG00000049299 | 0.000106904 | 0.004113382 Trappc1       |
| ENSMUSG00000031838 | 0.000104965 | 0.004052975 Ifi30         |
| ENSMUSG0000003555  | 0.000104702 | 0.004052975 Cyp17a1       |
| ENSMUSG00000027670 | 0.000103913 | 0.004040833 Ocstamp       |
| ENSMUSG00000029161 | 0.000103326 | 0.004032305 Cgref1        |
| ENSMUSG00000049686 | 0.000100672 | 0.003942734 Orai1         |
| ENSMUSG00000097061 | 9.81E-05    | 0.003854507 9330151L19Rik |
| ENSMUSG00000023960 | 9.79E-05    | 0.003854507 Enpp5         |
| ENSMUSG00000048498 | 9.63E-05    | 0.003812017 Cd300e        |
| ENSMUSG00000073424 | 9.61E-05    | 0.003812017 Cyp4f15       |
| ENSMUSG00000031903 | 9.49E-05    | 0.003784064 Pla2g15       |
| ENSMUSG00000041263 | 9.48E-05    | 0.003784064 Rusc1         |
| ENSMUSG00000019768 | 9.48E-05    | 0.003784064 Esr1          |
| ENSMUSG00000003355 | 9.30E-05    | 0.003747889 Fkbp11        |
| ENSMUSG00000036278 | 9.20E-05    | 0.003721017 Macrod1       |
| ENSMUSG00000037278 | 9.07E-05    | 0.00368315 Tmem97         |
| ENSMUSG00000030852 | 9.03E-05    | 0.003681626 Tacc2         |
| ENSMUSG00000071350 | 8.94E-05    | 0.003659891 Setdb2        |
| ENSMUSG00000027709 | 8.92E-05    | 0.003659891 Mccc1         |
| ENSMUSG00000015340 | 8.69E-05    | 0.003580747 Cybb          |
| ENSMUSG00000027999 | 8.66E-05    | 0.003580747 Pla2g12a      |
| ENSMUSG00000071415 | 8.65E-05    | 0.003580747 Rpl23         |
| ENSMUSG00000005373 | 8.52E-05    | 0.00355216 Mlxipl         |
| ENSMUSG00000027433 | 8.33E-05    | 0.003485923 Xrn2          |
| ENSMUSG00000039270 | 8.31E-05    | 0.003485923 Megf9         |
| ENSMUSG00000033102 | 8.09E-05    | 0.003411163 Cdc14b        |
| ENSMUSG00000073680 | 8.04E-05    | 0.003404518 Tmem88b       |
| ENSMUSG00000039230 | 7.84E-05    | 0.003333779 Tbcd          |
| ENSMUSG00000032353 | 7.79E-05    | 0.003324366 Tmed3         |
| ENSMUSG00000024072 | 7.45E-05    | 0.003190272 Yipf4         |
| ENSMUSG00000027313 | 7.41E-05    | 0.003188409 Chac1         |
| ENSMUSG00000020593 | 7.40E-05    | 0.003188409 Lpin1         |
| ENSMUSG00000004730 | 7.15E-05    | 0.003100003 Adgre1        |
| ENSMUSG00000075705 | 6.80E-05    | 0.002957008 Msrb1         |
| ENSMUSG00000024663 | 6.77E-05    | 0.002957008 Rab3il1       |
| ENSMUSG00000019478 | 6.71E-05    | 0.002944713 Rab4a         |
| ENSMUSG00000041132 | 6.63E-05    | 0.002921051 N4bp211       |
| ENSMUSG00000003660 | 6.45E-05    | 0.002853116 Snrnp200      |
| ENSMUSG00000032081 | 6.38E-05    | 0.002832514 Apoc3         |
| ENSMUSG00000004815 | 6.33E-05    | 0.002821136 Dgkq          |
| ENSMUSG00000058135 | 6.26E-05    | 0.002801204 Gstm1         |
| ENSMUSG00000041782 | 6.18E-05    | 0.002776277 Lad1          |

|                    |          |                           |
|--------------------|----------|---------------------------|
| ENSMUSG00000047153 | 6.11E-05 | 0.002757935 Khnyn         |
| ENSMUSG00000045665 | 5.91E-05 | 0.002676869 Mfsd5         |
| ENSMUSG00000015950 | 5.88E-05 | 0.00267371 Ncf1           |
| ENSMUSG00000006356 | 5.86E-05 | 0.00267371 Crip2          |
| ENSMUSG00000035757 | 5.75E-05 | 0.002636736 Selo          |
| ENSMUSG00000019362 | 5.64E-05 | 0.002597498 D8ErtD738e    |
| ENSMUSG00000028716 | 5.60E-05 | 0.002591806 Pdzk1ip1      |
| ENSMUSG00000011884 | 5.55E-05 | 0.002578589 Gltp          |
| ENSMUSG00000095041 | 5.53E-05 | 0.002578589 PISD          |
| ENSMUSG00000024899 | 5.48E-05 | 0.00256776 Papss2         |
| ENSMUSG00000022884 | 5.46E-05 | 0.00256776 Eif4a2         |
| ENSMUSG00000039640 | 5.42E-05 | 0.002561684 Mrpl12        |
| ENSMUSG00000034528 | 5.37E-05 | 0.002546942 Hsd17b13      |
| ENSMUSG00000036850 | 5.36E-05 | 0.002546942 Mrpl41        |
| ENSMUSG00000021327 | 5.21E-05 | 0.002494757 Zkscan3       |
| ENSMUSG00000001247 | 5.13E-05 | 0.002467846 Lsr           |
| ENSMUSG00000055128 | 5.03E-05 | 0.002428646 Cgrrf1        |
| ENSMUSG00000027533 | 5.00E-05 | 0.002427584 Fabp5         |
| ENSMUSG00000044749 | 4.87E-05 | 0.002371898 Abca6         |
| ENSMUSG00000001525 | 4.74E-05 | 0.002319071 Tubb5         |
| ENSMUSG00000042115 | 4.68E-05 | 0.002303648 Klhdc8a       |
| ENSMUSG00000020212 | 4.65E-05 | 0.002295422 Mdm1          |
| ENSMUSG00000038422 | 4.63E-05 | 0.002295422 Hdhd3         |
| ENSMUSG00000059775 | 4.51E-05 | 0.002248459 Rps26-ps1     |
| ENSMUSG00000045917 | 4.49E-05 | 0.002246003 6330416G13Rik |
| ENSMUSG00000000958 | 4.46E-05 | 0.002241352 Slc7a7        |
| ENSMUSG00000061906 | 4.42E-05 | 0.002234343 Ugt2b38       |
| ENSMUSG00000006360 | 4.37E-05 | 0.00221801 Crip1          |
| ENSMUSG00000030754 | 4.23E-05 | 0.002155384 Copb1         |
| ENSMUSG00000040918 | 4.20E-05 | 0.002153768 Slc19a2       |
| ENSMUSG00000023004 | 4.19E-05 | 0.002153768 Tuba1b        |
| ENSMUSG00000021281 | 4.17E-05 | 0.002153768 Tnfaip2       |
| ENSMUSG00000001604 | 4.14E-05 | 0.002149219 Tcea3         |
| ENSMUSG00000005836 | 4.10E-05 | 0.002141121 Gata6         |
| ENSMUSG00000069662 | 4.02E-05 | 0.002106688 Marcks        |
| ENSMUSG00000018166 | 4.01E-05 | 0.002106688 Erbb3         |
| ENSMUSG00000024843 | 3.91E-05 | 0.002072572 Chka          |
| ENSMUSG00000029380 | 3.82E-05 | 0.002033089 Cxcl1         |
| ENSMUSG00000020430 | 3.80E-05 | 0.00203097 Pes1           |
| ENSMUSG00000021134 | 3.75E-05 | 0.002013159 Srsf5         |
| ENSMUSG00000029385 | 3.72E-05 | 0.002007999 Ccng2         |
| ENSMUSG00000026095 | 3.66E-05 | 0.001988884 Asnsd1        |
| ENSMUSG00000002379 | 3.61E-05 | 0.001970116 Ndufa11       |
| ENSMUSG00000032383 | 3.60E-05 | 0.001970116 Ppib          |
| ENSMUSG00000032531 | 3.52E-05 | 0.001937961 Amotl2        |
| ENSMUSG00000008496 | 3.48E-05 | 0.001928307 Pou2f2        |
| ENSMUSG00000048706 | 3.32E-05 | 0.001848895 Lurap1l       |

|                    |          |                           |
|--------------------|----------|---------------------------|
| ENSMUSG00000050069 | 3.13E-05 | 0.001753333 Grem2         |
| ENSMUSG00000038084 | 3.11E-05 | 0.00174924 Opa1           |
| ENSMUSG00000000682 | 3.00E-05 | 0.001695434 Cd52          |
| ENSMUSG00000030579 | 3.00E-05 | 0.001695434 Tyrobp        |
| ENSMUSG00000026810 | 2.96E-05 | 0.001690689 Dpm2          |
| ENSMUSG00000031827 | 2.95E-05 | 0.001690689 Cotl1         |
| ENSMUSG00000030630 | 2.94E-05 | 0.001690689 Fah           |
| ENSMUSG00000025492 | 2.92E-05 | 0.001690689 Ifitm3        |
| ENSMUSG00000026348 | 2.77E-05 | 0.001614448 Acmsd         |
| ENSMUSG00000004837 | 2.76E-05 | 0.001614448 Grap          |
| ENSMUSG00000090622 | 2.73E-05 | 0.001611285 A930033H14Rik |
| ENSMUSG00000045817 | 2.72E-05 | 0.001610353 Zfp36l2       |
| ENSMUSG00000052914 | 2.66E-05 | 0.001585725 Cyp2j6        |
| ENSMUSG00000028405 | 2.63E-05 | 0.001577955 Aco1          |
| ENSMUSG00000048779 | 2.60E-05 | 0.001568719 P2ry6         |
| ENSMUSG00000028179 | 2.55E-05 | 0.001543731 Cth           |
| ENSMUSG00000045314 | 2.53E-05 | 0.001543504 Sowahb        |
| ENSMUSG00000024921 | 2.51E-05 | 0.001539044 Smarca2       |
| ENSMUSG00000028076 | 2.50E-05 | 0.001537099 Cd1d1         |
| ENSMUSG00000024561 | 2.44E-05 | 0.001510375 Mbd1          |
| ENSMUSG00000029304 | 2.43E-05 | 0.001510375 Spp1          |
| ENSMUSG00000071369 | 2.43E-05 | 0.001510375 Map3k5        |
| ENSMUSG00000075227 | 2.39E-05 | 0.00150386 Znhit2         |
| ENSMUSG00000072664 | 2.32E-05 | 0.001469656 Ugt3a1        |
| ENSMUSG00000024120 | 2.26E-05 | 0.001443586 Lrpprc        |
| ENSMUSG00000021171 | 2.23E-05 | 0.001429374 Esyt2         |
| ENSMUSG00000008845 | 2.21E-05 | 0.001427609 Cd163         |
| ENSMUSG00000030236 | 2.19E-05 | 0.00141828 Slco1b2        |
| ENSMUSG00000027983 | 2.17E-05 | 0.001415586 Cyp2u1        |
| ENSMUSG00000023078 | 2.15E-05 | 0.001413525 Cxcl13        |
| ENSMUSG00000051682 | 2.06E-05 | 0.001359072 Trem14        |
| ENSMUSG00000021236 | 1.99E-05 | 0.001324295 Entpd5        |
| ENSMUSG00000024737 | 1.89E-05 | 0.001265143 Slc15a3       |
| ENSMUSG00000037902 | 1.89E-05 | 0.001265143 Sirpa         |
| ENSMUSG00000020088 | 1.85E-05 | 0.001252238 Sar1a         |
| ENSMUSG00000043633 | 1.83E-05 | 0.001247243 Fam221b       |
| ENSMUSG00000035948 | 1.83E-05 | 0.001247243 Acss3         |
| ENSMUSG00000062382 | 1.82E-05 | 0.001247243 Gm10116       |
| ENSMUSG00000040616 | 1.80E-05 | 0.001247243 Tmem51        |
| ENSMUSG00000062209 | 1.74E-05 | 0.001215963 Erbb4         |
| ENSMUSG00000063232 | 1.73E-05 | 0.001214593 Serpina11     |
| ENSMUSG00000001128 | 1.66E-05 | 0.001175426 Cfp           |
| ENSMUSG00000022615 | 1.66E-05 | 0.001175426 Tymp          |
| ENSMUSG00000026547 | 1.63E-05 | 0.001167806 Tagln2        |
| ENSMUSG00000044206 | 1.62E-05 | 0.001165515 Vsig4         |
| ENSMUSG00000052595 | 1.60E-05 | 0.001165515 A1cf          |
| ENSMUSG00000025132 | 1.56E-05 | 0.001139705 Arhgdia       |

|                    |          |                           |
|--------------------|----------|---------------------------|
| ENSMUSG00000058099 | 1.49E-05 | 0.001097061 Nfam1         |
| ENSMUSG00000002111 | 1.47E-05 | 0.001089524 Spi1          |
| ENSMUSG00000049971 | 1.45E-05 | 0.001083692 Glt1d1        |
| ENSMUSG00000058672 | 1.41E-05 | 0.001061759 Tubb2a        |
| ENSMUSG00000043091 | 1.37E-05 | 0.001038236 Tuba1c        |
| ENSMUSG00000031938 | 1.35E-05 | 0.001025623 4931406C07Rik |
| ENSMUSG00000021620 | 1.33E-05 | 0.001023074 Acot12        |
| ENSMUSG00000032083 | 1.31E-05 | 0.001009943 Apoa1         |
| ENSMUSG00000019256 | 1.26E-05 | 0.000976956 Ahr           |
| ENSMUSG00000051439 | 1.22E-05 | 0.000953047 Cd14          |
| ENSMUSG00000056851 | 1.18E-05 | 0.000933033 Pcbp2         |
| ENSMUSG00000025199 | 1.16E-05 | 0.000922459 Chuk          |
| ENSMUSG00000023959 | 1.16E-05 | 0.000922459 Clic5         |
| ENSMUSG00000026655 | 1.11E-05 | 0.000894769 Fam107b       |
| ENSMUSG00000057666 | 1.11E-05 | 0.000894769 Gapdh         |
| ENSMUSG00000016382 | 1.08E-05 | 0.000886148 Pls3          |
| ENSMUSG00000025372 | 1.05E-05 | 0.000868203 Baiap2        |
| ENSMUSG00000060002 | 1.03E-05 | 0.000855775 Chpt1         |
| ENSMUSG00000025014 | 1.01E-05 | 0.000848864 Dntt          |
| ENSMUSG00000056204 | 1.01E-05 | 0.000848864 Pgpep1        |
| ENSMUSG00000027359 | 1.01E-05 | 0.000848864 Slc27a2       |
| ENSMUSG00000029669 | 9.90E-06 | 0.000848032 Tspan12       |
| ENSMUSG00000048249 | 9.85E-06 | 0.000848032 Crebrf        |
| ENSMUSG00000026890 | 9.64E-06 | 0.000839217 Lhx6          |
| ENSMUSG00000020101 | 9.00E-06 | 0.000789249 4632428N05Rik |
| ENSMUSG00000021365 | 8.53E-06 | 0.00075439 Nedd9          |
| ENSMUSG00000033863 | 8.47E-06 | 0.00075439 Klf9           |
| ENSMUSG00000022797 | 8.35E-06 | 0.000750497 Tfrc          |
| ENSMUSG00000029656 | 8.21E-06 | 0.000743753 C8b           |
| ENSMUSG00000033685 | 8.08E-06 | 0.00073834 Ucp2           |
| ENSMUSG00000067279 | 7.56E-06 | 0.000696791 Ppp1r3c       |
| ENSMUSG00000078193 | 7.53E-06 | 0.000696791 Gm2000        |
| ENSMUSG00000008999 | 7.49E-06 | 0.000696791 Bmp7          |
| ENSMUSG00000009569 | 6.10E-06 | 0.000576865 Mkl2          |
| ENSMUSG00000014542 | 5.51E-06 | 0.000525438 Clec4f        |
| ENSMUSG00000037405 | 4.96E-06 | 0.000477361 Icam1         |
| ENSMUSG00000054793 | 4.61E-06 | 0.000447627 Cadm4         |
| ENSMUSG00000018920 | 3.89E-06 | 0.00038065 Cxcl16         |
| ENSMUSG00000096688 | 3.85E-06 | 0.000380032 Mup17         |
| ENSMUSG00000032265 | 3.84E-06 | 0.000380032 Fam46a        |
| ENSMUSG00000031666 | 3.21E-06 | 0.000323216 Rbl2          |
| ENSMUSG00000089960 | 3.18E-06 | 0.000322533 Ugt1a1        |
| ENSMUSG00000069792 | 3.08E-06 | 0.000315205 Wfdc17        |
| ENSMUSG00000032288 | 2.91E-06 | 0.000301232 Imp3          |
| ENSMUSG00000056035 | 2.64E-06 | 0.000275704 Cyp3a11       |
| ENSMUSG00000022464 | 2.57E-06 | 0.00027131 Slc38a4        |
| ENSMUSG00000015090 | 2.54E-06 | 0.000269904 Ptgds         |

|                    |          |                     |
|--------------------|----------|---------------------|
| ENSMUSG00000041378 | 2.41E-06 | 0.00025958 Cldn5    |
| ENSMUSG00000057963 | 2.41E-06 | 0.00025958 Itpk1    |
| ENSMUSG00000021048 | 2.04E-06 | 0.000223567 Mthfd1  |
| ENSMUSG00000030934 | 1.94E-06 | 0.000214928 Oat     |
| ENSMUSG00000034780 | 1.92E-06 | 0.000214707 B3galt1 |
| ENSMUSG00000032478 | 1.83E-06 | 0.000206922 Nme6    |
| ENSMUSG00000022304 | 1.78E-06 | 0.00020276 Dpys     |
| ENSMUSG00000037526 | 1.71E-06 | 0.000196858 Atg14   |
| ENSMUSG00000032725 | 1.67E-06 | 0.000194572 Folr2   |
| ENSMUSG00000062901 | 1.54E-06 | 0.000181955 Kihl24  |
| ENSMUSG00000078683 | 1.44E-06 | 0.000171148 Mup1    |
| ENSMUSG00000079227 | 1.31E-06 | 0.000158375 Ccr5    |
| ENSMUSG00000073982 | 1.27E-06 | 0.000154881 Rhog    |
| ENSMUSG00000006589 | 1.21E-06 | 0.00014948 Aprt     |
| ENSMUSG00000037820 | 1.21E-06 | 0.00014948 Tgm2     |
| ENSMUSG00000058396 | 1.19E-06 | 0.00014948 Gpr182   |
| ENSMUSG00000034006 | 1.16E-06 | 0.000147815 Pqlc1   |
| ENSMUSG00000032599 | 1.14E-06 | 0.000146577 Ip6k2   |
| ENSMUSG00000075706 | 1.10E-06 | 0.000143908 Gpx4    |
| ENSMUSG00000040026 | 1.04E-06 | 0.000136754 Saa3    |
| ENSMUSG00000026749 | 8.54E-07 | 0.000114154 Nek6    |
| ENSMUSG00000045287 | 6.93E-07 | 9.38E-05 Rtn4rl1    |
| ENSMUSG00000047617 | 6.91E-07 | 9.38E-05 BC029214   |
| ENSMUSG00000002910 | 6.66E-07 | 9.24E-05 Arrdc2     |
| ENSMUSG00000026475 | 6.36E-07 | 8.95E-05 Rgs16      |
| ENSMUSG00000057074 | 6.13E-07 | 8.73E-05 Ces1g      |
| ENSMUSG00000056973 | 5.57E-07 | 8.03E-05 Ces1d      |
| ENSMUSG00000026610 | 5.26E-07 | 7.69E-05 Esrrg      |
| ENSMUSG00000049932 | 5.24E-07 | 7.69E-05 H2afx      |
| ENSMUSG00000041044 | 5.07E-07 | 7.62E-05 Lrit1      |
| ENSMUSG00000045551 | 4.50E-07 | 6.85E-05 Fpr1       |
| ENSMUSG00000035540 | 4.43E-07 | 6.84E-05 Gc         |
| ENSMUSG00000048756 | 4.30E-07 | 6.74E-05 Foxo3      |
| ENSMUSG00000052085 | 4.07E-07 | 6.47E-05 Dock8      |
| ENSMUSG00000043079 | 4.02E-07 | 6.47E-05 Synpo      |
| ENSMUSG00000021508 | 3.96E-07 | 6.47E-05 Cxcl14     |
| ENSMUSG00000015947 | 3.45E-07 | 5.73E-05 Fcgr1      |
| ENSMUSG00000019947 | 3.45E-07 | 5.73E-05 Arid5b     |
| ENSMUSG00000029802 | 3.08E-07 | 5.27E-05 Abcg2      |
| ENSMUSG00000066687 | 2.84E-07 | 4.94E-05 Zbtb16     |
| ENSMUSG00000028603 | 2.74E-07 | 4.84E-05 Scp2       |
| ENSMUSG00000022587 | 2.70E-07 | 4.84E-05 Ly6e       |
| ENSMUSG00000041845 | 2.63E-07 | 4.81E-05 Rhod       |
| ENSMUSG00000027187 | 2.44E-07 | 4.53E-05 Cat        |
| ENSMUSG00000034427 | 2.41E-07 | 4.53E-05 Myo15b     |
| ENSMUSG00000004038 | 2.35E-07 | 4.53E-05 Gstm3      |
| ENSMUSG00000078686 | 2.18E-07 | 4.27E-05 Mup9       |

|                    |          |                   |
|--------------------|----------|-------------------|
| ENSMUSG0000002602  | 1.64E-07 | 3.26E-05 Axl      |
| ENSMUSG00000025195 | 1.59E-07 | 3.22E-05 Dnmbp    |
| ENSMUSG00000028445 | 1.33E-07 | 2.76E-05 Enho     |
| ENSMUSG00000020893 | 1.32E-07 | 2.76E-05 Per1     |
| ENSMUSG00000008035 | 1.21E-07 | 2.59E-05 Mid1ip1  |
| ENSMUSG00000036885 | 1.11E-07 | 2.44E-05 Arhgef26 |
| ENSMUSG00000002992 | 1.09E-07 | 2.44E-05 Apoc2    |
| ENSMUSG00000024621 | 1.05E-07 | 2.39E-05 Csf1r    |
| ENSMUSG00000010609 | 1.01E-07 | 2.36E-05 Psen2    |
| ENSMUSG00000029455 | 8.00E-08 | 1.91E-05 Aldh2    |
| ENSMUSG00000025006 | 6.14E-08 | 1.50E-05 Sorbs1   |
| ENSMUSG00000033220 | 4.82E-08 | 1.20E-05 Rac2     |
| ENSMUSG00000049775 | 4.81E-08 | 1.20E-05 Tmsb4x   |
| ENSMUSG00000022946 | 4.75E-08 | 1.20E-05 Dopey2   |
| ENSMUSG00000031725 | 4.45E-08 | 1.19E-05 Ces1f    |
| ENSMUSG00000059089 | 4.06E-08 | 1.11E-05 Fcgr4    |
| ENSMUSG00000049988 | 2.22E-08 | 6.26E-06 Lrrc25   |
| ENSMUSG00000005674 | 2.21E-08 | 6.26E-06 Tomm40l  |
| ENSMUSG00000063558 | 2.12E-08 | 6.26E-06 Aox1     |
| ENSMUSG00000028680 | 2.08E-08 | 6.26E-06 Plk3     |
| ENSMUSG00000010307 | 1.69E-08 | 5.28E-06 Tmem86a  |
| ENSMUSG00000053279 | 1.53E-08 | 4.94E-06 Aldh1a1  |
| ENSMUSG00000028581 | 1.43E-08 | 4.75E-06 Lptm5    |
| ENSMUSG00000039782 | 9.32E-09 | 3.20E-06 Cpeb2    |
| ENSMUSG00000070720 | 8.95E-09 | 3.16E-06 Tmem200b |
| ENSMUSG00000031844 | 8.61E-09 | 3.15E-06 Hsd17b2  |
| ENSMUSG00000026938 | 8.46E-09 | 3.15E-06 Fcna     |
| ENSMUSG00000072620 | 6.97E-09 | 2.73E-06 Slfn2    |
| ENSMUSG00000018574 | 1.83E-09 | 7.41E-07 Acadvl   |
| ENSMUSG00000023044 | 1.41E-09 | 5.97E-07 Csad     |
| ENSMUSG00000020776 | 9.33E-10 | 4.09E-07 Fbf1     |
| ENSMUSG00000026390 | 8.09E-10 | 3.70E-07 Marco    |
| ENSMUSG00000029630 | 6.83E-10 | 3.26E-07 Cyp3a25  |
| ENSMUSG00000000957 | 6.13E-10 | 3.06E-07 Mmp14    |
| ENSMUSG00000025743 | 4.06E-10 | 2.12E-07 Sdc3     |
| ENSMUSG00000052837 | 3.80E-10 | 2.08E-07 Junb     |
| ENSMUSG00000028755 | 2.97E-10 | 1.72E-07 Cda      |
| ENSMUSG00000053063 | 2.24E-10 | 1.36E-07 Clec12a  |
| ENSMUSG00000030935 | 1.54E-10 | 9.92E-08 Acsm3    |
| ENSMUSG00000025612 | 2.82E-11 | 1.93E-08 Bach1    |
| ENSMUSG00000058715 | 2.25E-11 | 1.65E-08 Fcer1g   |
| ENSMUSG00000027559 | 1.67E-11 | 1.31E-08 Car3     |
| ENSMUSG00000038641 | 1.40E-11 | 1.18E-08 Akr1d1   |
| ENSMUSG00000036896 | 8.36E-12 | 7.64E-09 C1qc     |
| ENSMUSG00000035828 | 3.66E-12 | 3.64E-09 Pim3     |
| ENSMUSG00000024052 | 2.76E-12 | 3.03E-09 Lpin2    |
| ENSMUSG00000036905 | 2.11E-12 | 2.58E-09 C1qb     |

|                    |          |                 |
|--------------------|----------|-----------------|
| ENSMUSG00000025794 | 1.05E-13 | 1.45E-10 Rpl14  |
| ENSMUSG00000036887 | 6.77E-15 | 1.06E-11 C1qa   |
| ENSMUSG00000019139 | 7.98E-16 | 1.46E-12 Isyna1 |
| ENSMUSG00000015854 | 2.30E-18 | 5.04E-15 Cd5l   |
| ENSMUSG00000057729 | 5.02E-22 | 1.38E-18 Prtn3  |
| ENSMUSG00000039533 | 1.36E-29 | 4.98E-26 Mmd2   |
| ENSMUSG00000024029 | 1.58E-30 | 8.64E-27 Tff3   |
| ENSMUSG00000035202 | 4.80E-32 | 5.26E-28 Lars2  |
